# Supplementary material for: Prone Positioning Decreases Inhomogeneity and Improves Dorsal Compliance in Invasively Ventilated Spontaneously Breathing COVID-19 Patients—A Study Using Electrical Impedance Tomography
Source: MDPI journal article supplement (doi:10.3390/diagnostics12102281), 2022-09-21
Supplement: s1 [file s1]

# Prone Positioning Decreases Inhomogeneity and Improves Dorsal Compliance in Invasively Ventilated Spontaneously Breathing COVID-19 Patients—A Study Using Electrical Impedance Tomography

## Supplementary Materials

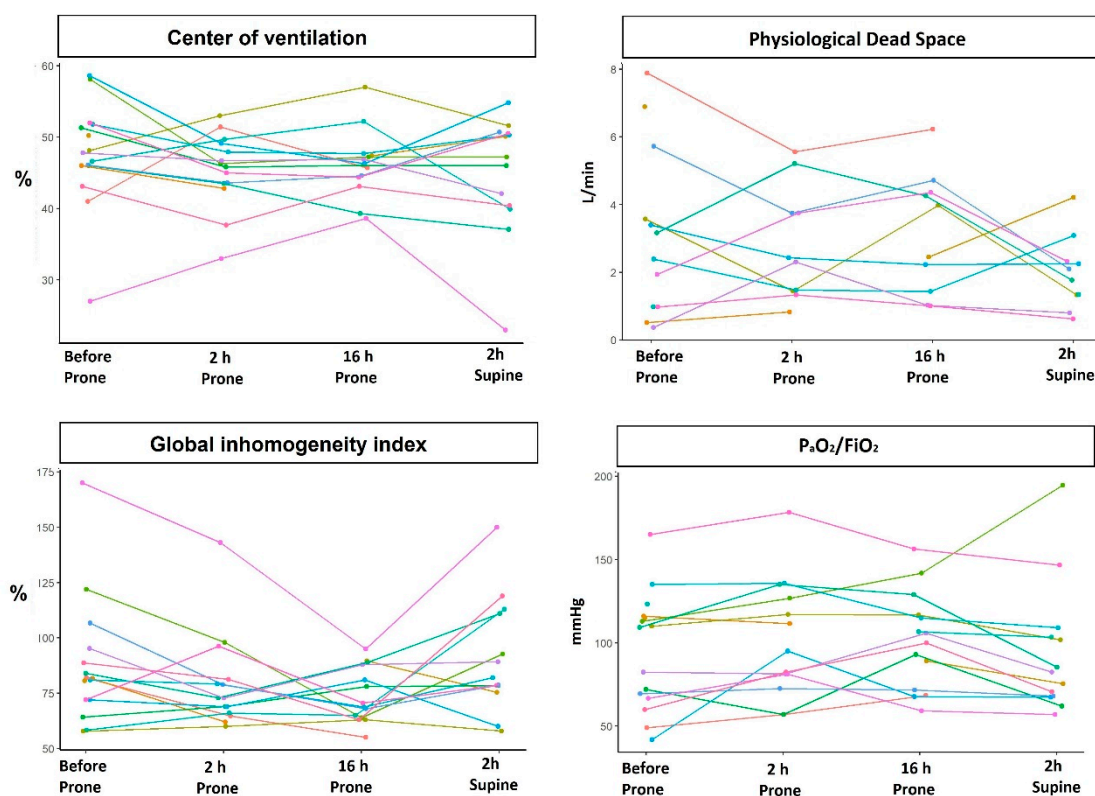

**Figure S1.** The dynamic effect of prone position (PP) on global ventilatory parameters.

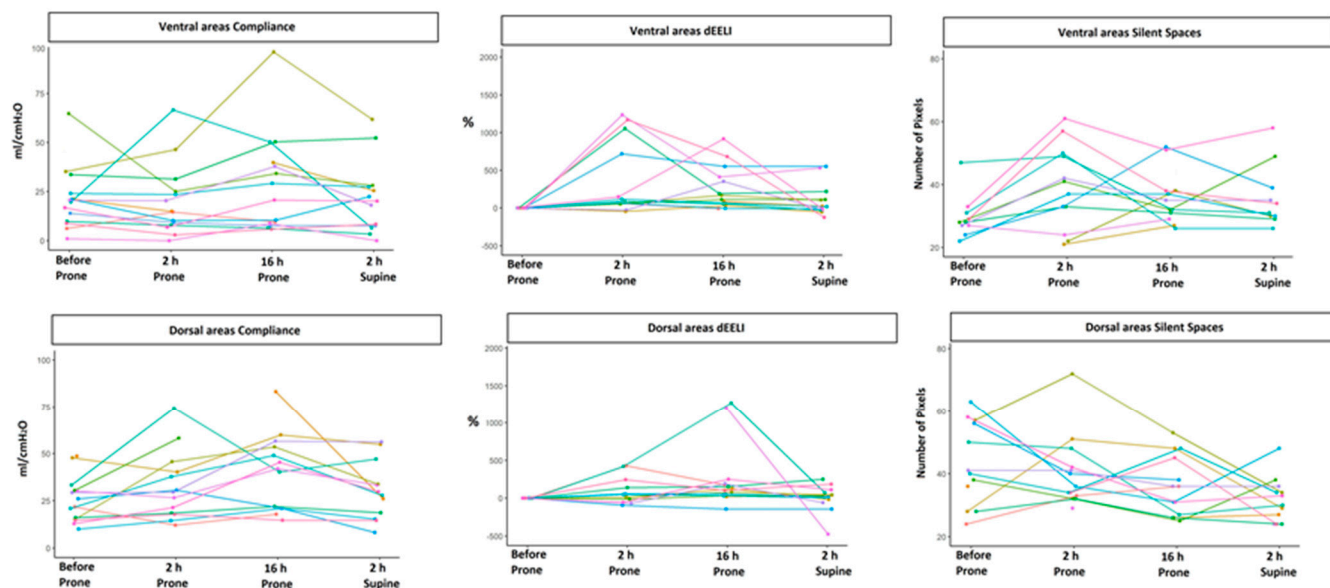

**Figure S2.** The dynamic effect of prone position (PP) on local compliance, changes in end-expiratory lung impedance, and silent spaces.
